# Supplementary material
Source: publisher figshare collection journal article supplement (https://acs.figshare.com/ndownloader/files/9109630)
Supplement: Supplementary file 1 [file 9109630]

## **Supporting Information**

**Title:** Structure-Dependent Hematological Effects of Per- and Polyfluoroalkyl Substances on  
Activation of Plasma Kallikrein–Kinin System Cascade

**Authors:** Qian S. Liu,<sup>†,‡</sup> Yuzhen Sun,<sup>†,§</sup> Guangbo Qu,<sup>†,‡</sup> Yanmin Long,<sup>§</sup> Xingchen Zhao,<sup>†,‡</sup>  
Aiqian Zhang,<sup>†,‡</sup> Qunfang Zhou,<sup>\*,†,‡</sup> Ligang Hu,<sup>\*,†,§</sup> Guibin Jiang<sup>†,‡</sup>

<sup>†</sup>State Key Laboratory of Environmental Chemistry and Ecotoxicology, Research Center for Eco-  
Environmental Sciences, Chinese Academy of Sciences, Beijing, 100085, P. R. China

<sup>‡</sup>College of Resources and Environment, University of Chinese Academy of Sciences, Beijing, 100049,  
P.R.China

<sup>§</sup>Institute of Environment and Health, Jiangnan University, Wuhan, 430000, P. R. China

\*Correspondence to: Dr. Qunfang Zhou, E-mail: [zhouqf@rcees.ac.cn](mailto:zhouqf@rcees.ac.cn)

Dr. Ligang Hu, E-mail: [lg hu@rcees.ac.cn](mailto:lg hu@rcees.ac.cn)

14 **Number of pages: 7**

15 **Number of figures: 6**

16 **Number of tables: 1**

17

## 18 **Summary of supporting information**

19 Fig. S1. Structures of PFASs and the related aliphatic compounds in this study.

20 Fig. S2. Characterization of ex vivo PPK activation in mouse plasma.

21 Fig. S3. The fluorescent characteristics of FXII.

22 Fig. S4. The binding modes of FTOHs to FXII.

23 Fig. S5. The binding modes of PFASs and the related long-chain aliphatic compounds to  
24 FXII.

25 Fig. S6. Effects of HSA on PFAS-induced FXII activation.

26 Table S1. The calculated docking scores for the binding interaction energies between FXII  
27 and PFASs or the related long-chain aliphatic compounds tested in this study.

28

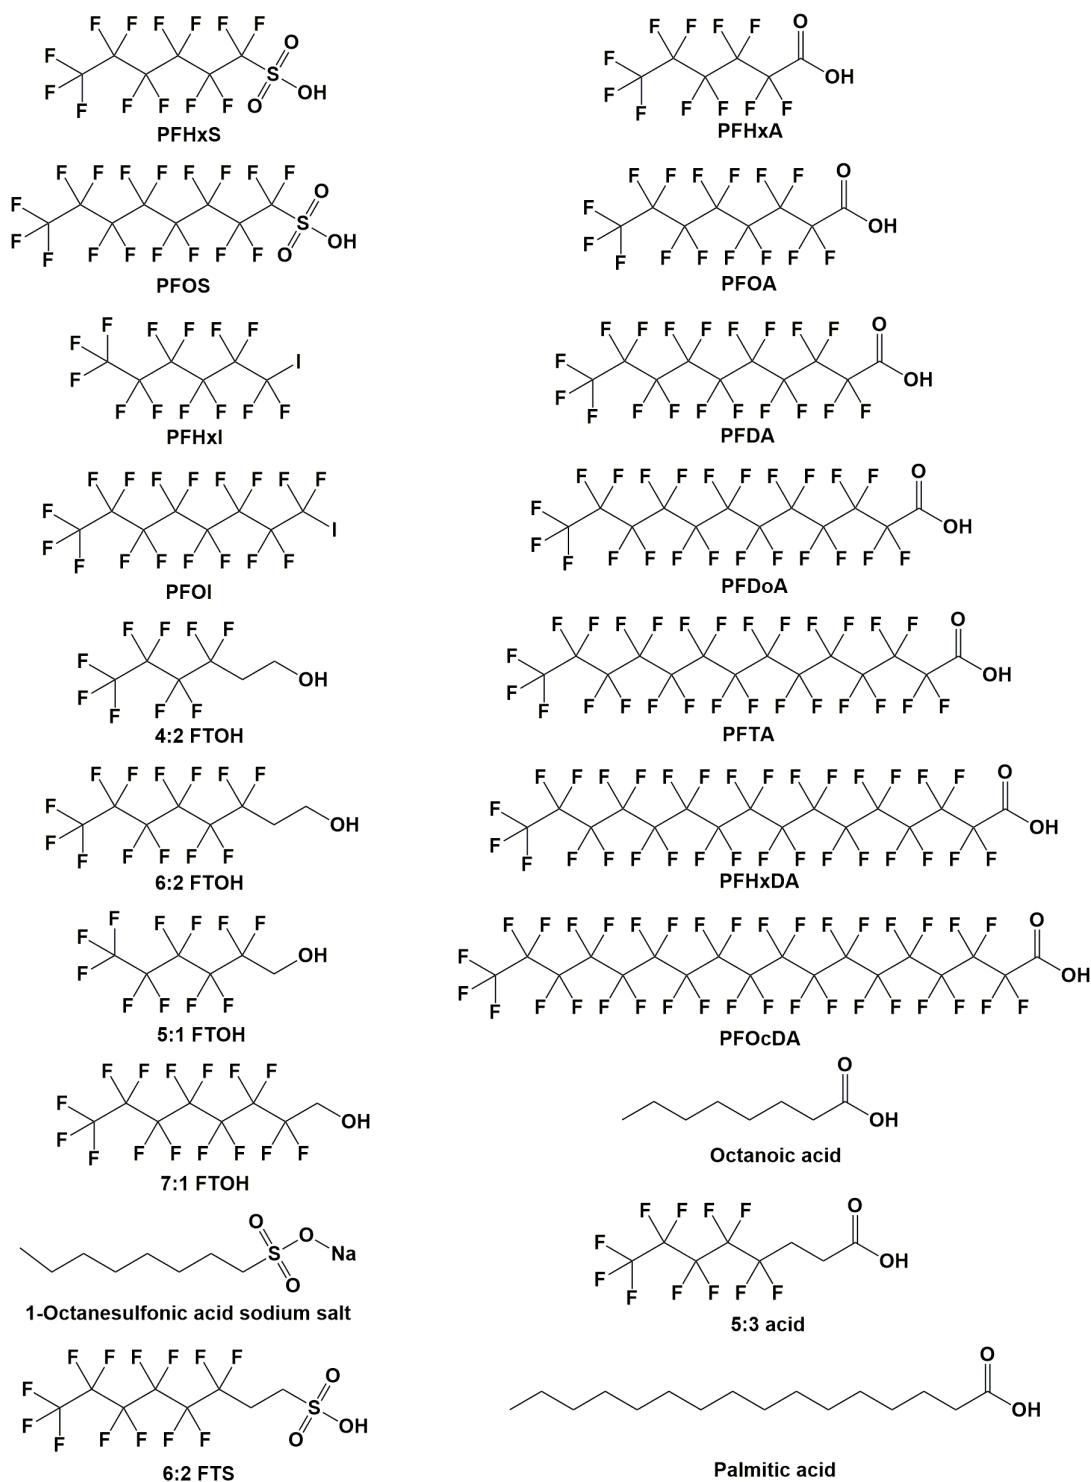

**Fig. S1. Structures of PFASs and the related aliphatic compounds in this study.**

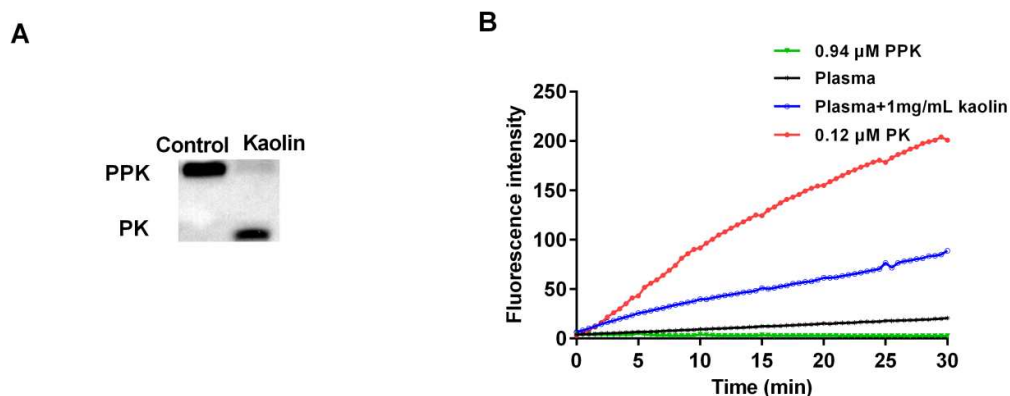

**Fig. S2. Characterization of ex vivo PPK activation in mouse plasma.** (a) Western blot for PPK cleavage in mouse plasma upon the stimulation of kaolin, a typical KKS activator. The PPK (~75 kDa) was abundant in the control plasma, while Kaolin treatment (1 mg/mL) caused the striking weakening of PPK band and the significant enhancement of PK band (~52 kDa), showing ex vivo PPK cleavage and KKS activation. (b) Kallikrein-like activity assay. The addition of Kaolin obviously increased kallikrein-like activity in plasma due to the induction of KKS activation.

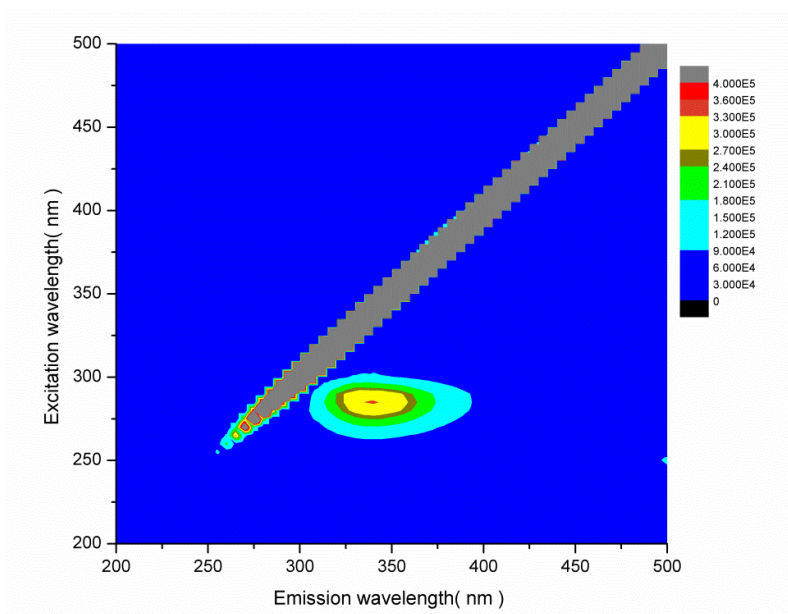

**Fig. S3. The fluorescent characteristics of FXII.** The monitoring of  $\lambda_{em}$  in the range of 300-450 nm showed the maximum value was 350 nm for FXII ( $\lambda_{ex}$  280 nm).

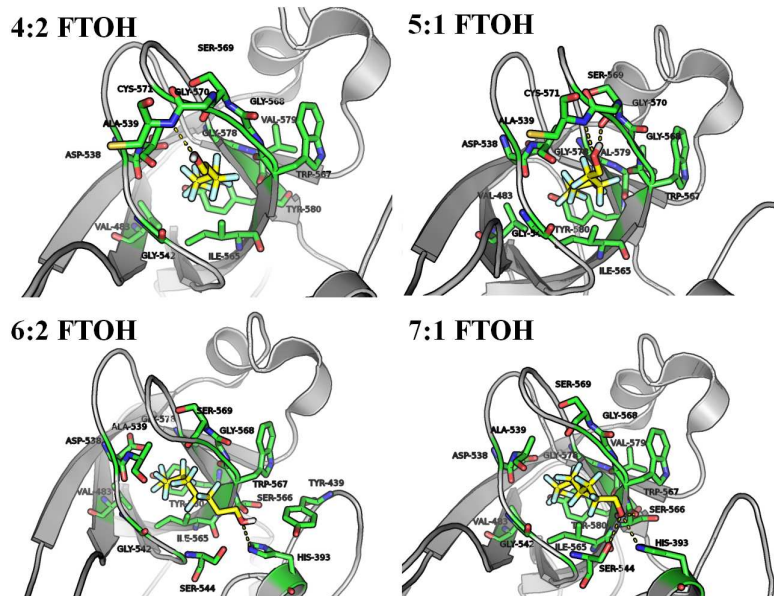

**Fig. S4. The binding modes of FTOHs to FXII.**

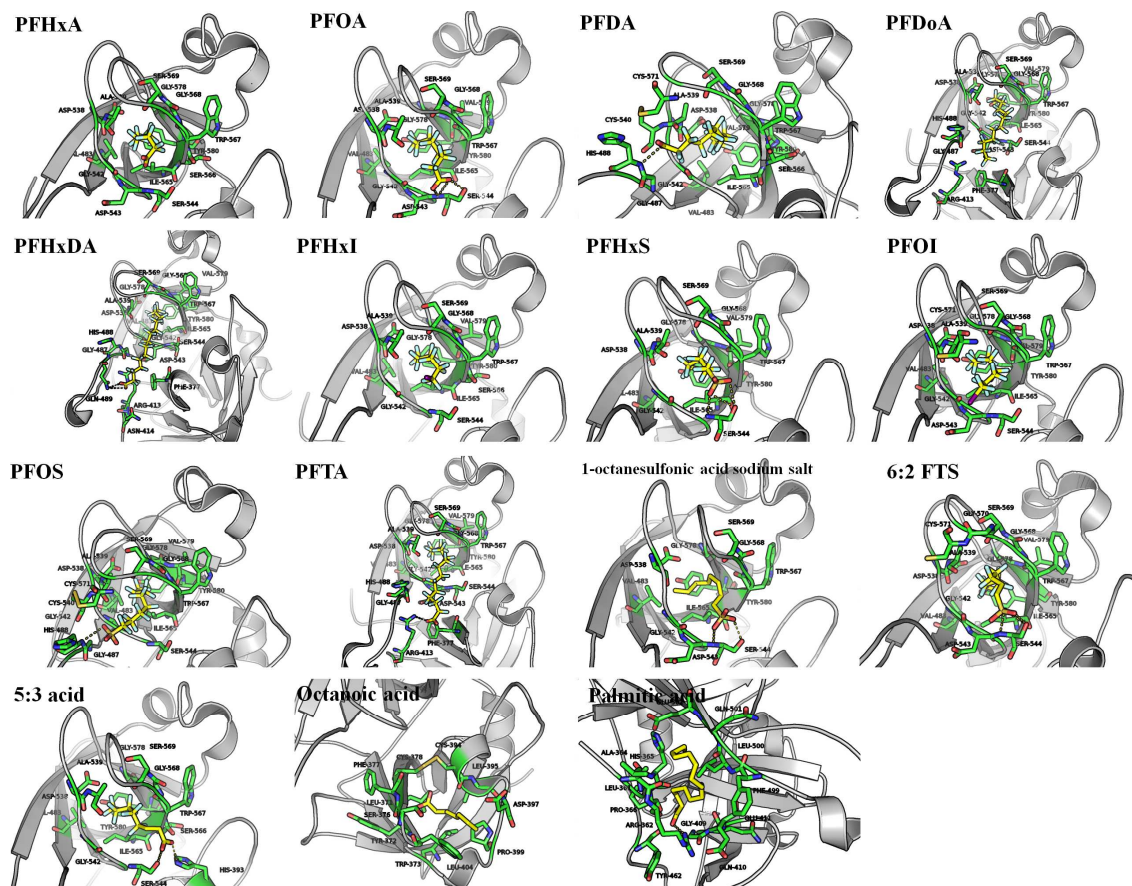

**Fig. S5. The binding modes of PFASs and the related long-chain aliphatic compounds to FXII.**

54

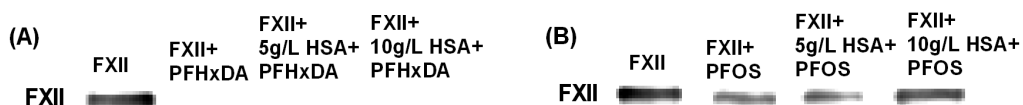

55

56

57 **Fig. S6. Effects of HSA on PFAS-induced FXII activation. (A)** 100  $\mu$ M PFHxDA. **(B)** 5  
 58 mM PFOS. The level of FXII was 0.58  $\mu$ M, and the concentrations of HSA were controlled at  
 59 5 and 10 g/L, respectively. The incubation lasted for 2 h.

60

61 **Table S1. The calculated docking scores for the binding interaction energies between**  
 62 **FXII and PFASs or the related long-chain aliphatic compounds tested in this study.**

63

| Structural factor   |                                       | Compound | CAS        | Docking score |
|---------------------|---------------------------------------|----------|------------|---------------|
| Carbon chain length | Terminated with<br>-COOH              | PFOcDA   | 16517-11-6 | <b>-10.04</b> |
|                     |                                       | PFHxDA   | 67905-19-5 | <b>-9.69</b>  |
|                     |                                       | PFTA     | 376-06-7   | <b>-9.08</b>  |
|                     |                                       | PFDcA    | 307-55-1   | <b>-8.63</b>  |
|                     |                                       | PFDA     | 335-76-2   | <b>-8.23</b>  |
|                     |                                       | PFOA     | 335-67-1   | <b>-8.02</b>  |
|                     |                                       | PFHxA    | 307-24-4   | <b>-7.08</b>  |
|                     | Terminated with<br>-SO <sub>3</sub> H | PFOS     | 2795-39-3  | <b>-8.22</b>  |
|                     |                                       | PFHxS    | 3871-99-6  | <b>-7.69</b>  |
| Terminal group      | C6                                    | PFHxS    | 3871-99-6  | <b>-7.69</b>  |
|                     |                                       | PFHxA    | 307-24-4   | <b>-7.08</b>  |
|                     |                                       | 5:1 FTOH | 423-46-1   | <b>-6.88</b>  |
|                     |                                       | 4:2 FTOH | 2043-47-2  | <b>-6.45</b>  |
|                     |                                       | PFHxI    | 355-43-1   | <b>-7.3</b>   |

|                                              |                                          |                                      |             |              |
|----------------------------------------------|------------------------------------------|--------------------------------------|-------------|--------------|
|                                              | C8                                       | PFOS                                 | 2795-39-3   | <b>-8.22</b> |
|                                              |                                          | PFOA                                 | 335-67-1    | <b>-8.02</b> |
|                                              |                                          | 7:1 FTOH                             | 307-30-2    | <b>-7.62</b> |
|                                              |                                          | 6:2 FTOH                             | 647-42-7    | <b>-7.29</b> |
|                                              |                                          | PFOI                                 | 507-63-1    | <b>-7.62</b> |
| <b>Fluorine atom<br/>substitution degree</b> | C8 terminated with<br>-SO <sub>3</sub> H | PFOS                                 | 2795-39-3   | <b>-8.22</b> |
|                                              |                                          | 6:2 FTS                              | 27619-97-2  | <b>-7.59</b> |
|                                              |                                          | 1-octanesulfonic acid<br>sodium salt | 5324-84-5   | <b>-4.77</b> |
|                                              | C8 terminated with<br>-COOH              | PFOA                                 | 335-67-1    | <b>-8.02</b> |
|                                              |                                          | 5:3 acid                             | 914637-49-3 | <b>-7.06</b> |
|                                              |                                          | octanoic acid                        | 124-07-2    | <b>-4.86</b> |
|                                              | C16 terminated with<br>-COOH             | PFHxDA                               | 67905-19-5  | <b>-9.69</b> |
|                                              |                                          | palmitic acid                        | 57-10-3     | <b>-5.14</b> |
